# Supplementary material
Source: Springer Nature journal article supplement (https://www.springermedizin.de/resource/supplementary/12978_2013_245_MOESM7_ESM.pdf/9602310)
Supplement: MOESM7 [file 9602310]

| Variables                          |                | Domestic violence |            |               |                |
|------------------------------------|----------------|-------------------|------------|---------------|----------------|
|                                    |                | Yes n (%)         | No n (%)   | COR(95%CI)    | AOR(95%CI)     |
| Husband drug use                   | Yes            | 362(72.4%)        | 107(58.8%) | 1.9(1.3,2.8)  | 1.9(1.3,2.8)   |
|                                    | No             | 138(27.6%)        | 75(41.2%)  | 1.0           | 1.0            |
| Pregnancy of women                 | Yes            | 202(40.4%)        | 39(21.4%)  | 2.1(1.4,3.2)  | 2.1(1.4,3.4)   |
|                                    | No             | 298(59.6%)        | 143(78.6%) | 1.0           | 1.0            |
| Decision maker of household issues | Husband        | 343(68.6%)        | 82(45.1%)  | 2.6(1.8,3.8)  | 2.3(1.5,3.4)   |
|                                    | Wife           | 10(2.0%)          | 5(2.7%)    | 1.3(0.4,4.3)  | 0.9(0.3,3.3)   |
|                                    | Jointly        | 147(29.4%)        | 95(52.2%)  | 1.0           | 1.0            |
| Age of husband                     | 20-24          | 7(1.3%)           | 9(6.0%)    | 1.0           | 1.0            |
|                                    | 25-29          | 53(10.0%)         | 24(16.0%)  | 2.8(0.9,8.5)  | 3.4(1.0, 11.2) |
|                                    | 30-34          | 99(18.6%)         | 26(17.3%)  | 4.9(1.7,14.4) | 4.4(1.3, 14.2) |
|                                    | 35-39          | 80(15.0%)         | 15(10.0%)  | 6.9(2.2,21.3) | 6.7(1.9, 23.4) |
|                                    | 40-44          | 108(20.3%)        | 30(20.0%)  | 4.6(1.6,13.5) | 4.9(1.5,16.3)  |
|                                    | 45-49          | 63(11.8%)         | 12(8.0%)   | 6.8(2.1,21.6) | 7.2(1.9,26.5)  |
|                                    | ≥50            | 122(22.9%)        | 34(22.7%)  | 4.6(1.6,13.3) | 5.1(1.5,17.3)  |
| Household annual income (USD)      | <280.22        | 173(32.5%)        | 54(36.0%)  | 1.0           | 1.0            |
|                                    | 280.22-508.76- | 195(36.7%)        | 32(21.3%)  | 1.9(1.2,3.1)  | 1.9(1.1,3.3)   |
|                                    | >508.76        | 164(30.8%)        | 64(42.7%)  | 0.8(0.5,1.2)  | 0.7(0.4,1.2)   |
| Educational status women           | Illiterate     | 329(61.8%)        | 78(52.0%)  | 1.0           | 1.0            |
|                                    | Read and write | 80(15.0%)         | 22(14.7%)  | 0.9(0.5,1.5)  | 0.8(0.5,1.5)   |
|                                    | 1-6 grades     | 58(10.9%)         | 22(14.7%)  | 0.6(0.4,1.1)  | 0.5(0.3,0.9)   |
|                                    | 7-12 grade     | 38(7.1%)          | 11(7.3%)   | 0.8(0.4,1.7)  | 2.0(0.9,4.9)   |
|                                    | 12+            | 27(5.1%)          | 17(11.3%)  | 0.4(0.2,0.7)  | 1.3(0.5,3.1)   |
